# Supplementary material
Source: publisher figshare collection journal article supplement (https://geolsoc.figshare.com/ndownloader/files/31670091)
Supplement: Supplementary file 1 [file 31670091]

**Supplementary material (Table S1). Laser Ablation–Inductively Coupled Plasma–Mass Spectrometry zircon U-Pb data of the Bikin–Bol'shaya Ussurka granitoid suites**

| **Spot no.** | **207Pb/235U** | **2σ** | **206Pb/238U** | **2σ** | **207Pb/206Pb** | **2σ** | **207Pb/235U (age)** | **2σ** | **206Pb/238U (age)** | **2σ** |
| --- | --- | --- | --- | --- | --- | --- | --- | --- | --- | --- |
| PrVl-1 - 6 | 0.1116 | 0.0083 | 0.01597 | 0.00024 | 0.0509 | 0.004 | 107.0 | 7.6 | 102.1 | 1.5 |
| PrVl-1 - 1 | 0.117 | 0.01 | 0.016 | 0.00037 | 0.0525 | 0.004 | 112.2 | 9.4 | 102.3 | 2.3 |
| PrVl-1 - 2 | 0.1124 | 0.0092 | 0.016 | 0.00033 | 0.051 | 0.004 | 107.7 | 8.4 | 102.3 | 2.1 |
| PrVl-1 - 23 | 0.1107 | 0.0075 | 0.01612 | 0.00025 | 0.049 | 0.003 | 106.3 | 6.8 | 103.1 | 1.6 |
| PrVl-1 - 19 | 0.1139 | 0.0097 | 0.01613 | 0.00034 | 0.0513 | 0.005 | 109.0 | 8.8 | 103.1 | 2.2 |
| PrVl-1 - 24 | 0.1058 | 0.0074 | 0.01615 | 0.00026 | 0.0473 | 0.003 | 101.8 | 6.8 | 103.3 | 1.6 |
| PrVl-1 - 25 | 0.1138 | 0.006 | 0.01619 | 0.00022 | 0.0509 | 0.003 | 109.3 | 5.5 | 103.6 | 1.4 |
| PrVl-1 - 10 | 0.1082 | 0.0063 | 0.01635 | 0.00022 | 0.0483 | 0.003 | 104.1 | 5.7 | 104.5 | 1.4 |
| PrVl-1 - 7 | 0.125 | 0.011 | 0.01638 | 0.0002 | 0.0556 | 0.005 | 119.0 | 10.0 | 104.7 | 1.3 |
| PrVl-1 - 17 | 0.1042 | 0.0057 | 0.0164 | 0.00029 | 0.0462 | 0.003 | 100.5 | 5.2 | 104.8 | 1.8 |
| PrVl-1 - 11 | 0.1117 | 0.0077 | 0.01642 | 0.00021 | 0.0503 | 0.004 | 107.3 | 7.1 | 105.0 | 1.4 |
| PrVl-1 - 8 | 0.1126 | 0.0081 | 0.01661 | 0.00027 | 0.0491 | 0.003 | 108.0 | 7.4 | 106.2 | 1.7 |
| PrVl-1 - 13 | 0.1093 | 0.0078 | 0.01661 | 0.00031 | 0.0478 | 0.004 | 105.1 | 7.1 | 106.2 | 1.9 |
| PrVl-1 - 5 | 0.1199 | 0.0099 | 0.01666 | 0.00025 | 0.0524 | 0.004 | 114.5 | 8.9 | 106.5 | 1.6 |
| PrVl-1 - 21 | 0.1113 | 0.0061 | 0.01666 | 0.00025 | 0.0482 | 0.003 | 107.0 | 5.6 | 106.5 | 1.6 |
| PrVl-1 - 22 | 0.113 | 0.0065 | 0.01676 | 0.00028 | 0.0487 | 0.003 | 108.5 | 5.9 | 107.1 | 1.8 |
| PrVl-1 - 15 | 0.12 | 0.01 | 0.01687 | 0.00065 | 0.0511 | 0.004 | 114.7 | 9.3 | 107.9 | 4.1 |
| PrVl-1 - 12 | 0.1108 | 0.0084 | 0.01719 | 0.00033 | 0.0469 | 0.004 | 106.3 | 7.7 | 109.8 | 2.1 |
| PrVl-1 - 3 | 0.1129 | 0.0067 | 0.01722 | 0.00038 | 0.0478 | 0.003 | 108.4 | 6.1 | 110.1 | 2.4 |
|  |  |  |  |  |  |  |  |  |  |  |
| PrVl-2 - 12 | 0.1001 | 0.0072 | 0.01555 | 0.00023 | 0.0465 | 0.003 | 96.6 | 6.6 | 99.5 | 1.5 |
| PrVl-2 - 1 | 0.1091 | 0.005 | 0.01582 | 0.00019 | 0.0499 | 0.002 | 105.0 | 4.6 | 101.2 | 1.2 |
| PrVl-2 - 16 | 0.105 | 0.011 | 0.01585 | 0.00031 | 0.0482 | 0.005 | 101.0 | 10.0 | 101.4 | 2.0 |
| PrVl-2 - 24 | 0.1012 | 0.0075 | 0.01588 | 0.0003 | 0.0462 | 0.004 | 97.6 | 6.9 | 101.6 | 1.9 |
| PrVl-2 - 9 | 0.1015 | 0.0056 | 0.01589 | 0.00024 | 0.0455 | 0.002 | 98.0 | 5.2 | 101.6 | 1.5 |
| PrVl-2 - 22 | 0.1071 | 0.0072 | 0.01593 | 0.00027 | 0.0486 | 0.003 | 103.0 | 6.6 | 101.9 | 1.7 |
| PrVl-2 - 4 | 0.1056 | 0.0068 | 0.01596 | 0.00025 | 0.0481 | 0.003 | 101.7 | 6.2 | 102.1 | 1.6 |
| PrVl-2 - 17 | 0.1097 | 0.0075 | 0.01596 | 0.00028 | 0.049 | 0.003 | 105.4 | 6.8 | 102.1 | 1.7 |
| PrVl-2 - 21 | 0.1109 | 0.0081 | 0.01596 | 0.00027 | 0.0503 | 0.004 | 106.5 | 7.5 | 102.1 | 1.7 |
| PrVl-2 - 25 | 0.103 | 0.0076 | 0.01598 | 0.00026 | 0.0466 | 0.004 | 99.3 | 6.9 | 102.2 | 1.7 |
| PrVl-2 - 19 | 0.1001 | 0.0069 | 0.01599 | 0.00028 | 0.0451 | 0.003 | 96.6 | 6.4 | 102.2 | 1.8 |
| PrVl-2 - 5 | 0.1019 | 0.0078 | 0.01605 | 0.00026 | 0.046 | 0.004 | 98.2 | 7.1 | 102.7 | 1.7 |
| PrVl-2 - 23 | 0.108 | 0.012 | 0.01605 | 0.00033 | 0.0487 | 0.005 | 103.0 | 11.0 | 102.6 | 2.1 |
| PrVl-2 - 11 | 0.1115 | 0.0078 | 0.01613 | 0.00024 | 0.0492 | 0.003 | 107.0 | 7.1 | 103.1 | 1.5 |
| PrVl-2 - 3 | 0.1048 | 0.0068 | 0.01618 | 0.00032 | 0.0466 | 0.003 | 101.0 | 6.3 | 103.4 | 2.0 |
| PrVl-2 - 13 | 0.1023 | 0.0061 | 0.01619 | 0.00028 | 0.0457 | 0.003 | 98.7 | 5.7 | 103.5 | 1.8 |
| PrVl-2 - 6 | 0.1066 | 0.0054 | 0.01633 | 0.00024 | 0.0472 | 0.003 | 102.7 | 5.0 | 104.4 | 1.5 |
| PrVl-2 - 14 | 0.143 | 0.016 | 0.01637 | 0.00027 | 0.0621 | 0.007 | 134.0 | 14.0 | 104.7 | 1.7 |
| PrVl-2 - 15 | 0.139 | 0.011 | 0.01649 | 0.00028 | 0.0609 | 0.005 | 131.0 | 10.0 | 105.4 | 1.8 |
| PrVl-2 - 20 | 0.1054 | 0.0099 | 0.0166 | 0.00029 | 0.046 | 0.005 | 101.2 | 9.0 | 106.1 | 1.9 |
|  |  |  |  |  |  |  |  |  |  |  |
| Lvl-1 - 15 | 0.095 | 0.011 | 0.01563 | 0.00035 | 0.0448 | 0.005 | 91.5 | 9.6 | 100.0 | 2.3 |
| Lvl-1 - 13 | 0.099 | 0.012 | 0.01537 | 0.00044 | 0.0473 | 0.006 | 95.0 | 11.0 | 98.3 | 2.8 |
| Lvl-1 - 18 | 0.1022 | 0.0099 | 0.0154 | 0.00037 | 0.0493 | 0.005 | 98.2 | 9.1 | 98.5 | 2.3 |
| Lvl-1 - 9 | 0.103 | 0.013 | 0.01495 | 0.0004 | 0.0506 | 0.006 | 99.0 | 12.0 | 95.6 | 2.6 |
| Lvl-1 - 7 | 0.103 | 0.015 | 0.01523 | 0.00061 | 0.0511 | 0.008 | 98.0 | 14.0 | 97.4 | 3.9 |
| Lvl-1 - 6 | 0.104 | 0.011 | 0.01555 | 0.00036 | 0.048 | 0.005 | 100.0 | 10.0 | 99.5 | 2.3 |
| Lvl-1 - 2 | 0.104 | 0.012 | 0.01589 | 0.00046 | 0.0482 | 0.006 | 100.0 | 11.0 | 101.6 | 2.9 |
| Lvl-1 - 12 | 0.105 | 0.01 | 0.01594 | 0.00042 | 0.0488 | 0.005 | 100.8 | 9.7 | 102.0 | 2.6 |
| Lvl-1 - 22 | 0.106 | 0.014 | 0.01543 | 0.00034 | 0.0513 | 0.007 | 101.0 | 13.0 | 98.7 | 2.2 |
| Lvl-1 - 3 | 0.1063 | 0.0073 | 0.01527 | 0.00027 | 0.0507 | 0.003 | 102.3 | 6.7 | 97.7 | 1.7 |
| Lvl-1 - 10 | 0.107 | 0.014 | 0.01531 | 0.0004 | 0.0521 | 0.007 | 103.0 | 13.0 | 97.9 | 2.5 |
| Lvl-1 - 14 | 0.1084 | 0.0063 | 0.01627 | 0.0004 | 0.0497 | 0.003 | 106.9 | 5.8 | 104.0 | 2.5 |
| Lvl-1 - 1 | 0.109 | 0.011 | 0.01491 | 0.00046 | 0.0537 | 0.006 | 104.0 | 10.0 | 95.4 | 2.9 |
| Lvl-1 - 8 | 0.1094 | 0.0092 | 0.01549 | 0.0004 | 0.0517 | 0.004 | 105.0 | 8.4 | 99.1 | 2.5 |
| Lvl-1 - 23 | 0.112 | 0.015 | 0.01562 | 0.00047 | 0.0534 | 0.008 | 106.0 | 14.0 | 99.9 | 3.0 |
| Lvl-1 - 19 | 0.115 | 0.015 | 0.01514 | 0.00042 | 0.0567 | 0.008 | 109.0 | 13.0 | 96.8 | 2.7 |
| Lvl-1 - 17 | 0.119 | 0.011 | 0.01594 | 0.00046 | 0.0551 | 0.005 | 113.0 | 10.0 | 101.9 | 2.9 |
|  |  |  |  |  |  |  |  |  |  |  |
| Sn-1 - 25 | 0.0932 | 0.0055 | 0.01412 | 0.0002 | 0.0471 | 0.0028 | 90.3 | 5.1 | 90.4 | 1.3 |
| Sn-1 - 10 | 0.0939 | 0.0067 | 0.01444 | 0.00021 | 0.0469 | 0.0033 | 90.9 | 6.2 | 92.4 | 1.3 |
| Sn-1 - 19 | 0.0946 | 0.0063 | 0.01468 | 0.00032 | 0.0462 | 0.0031 | 91.6 | 5.9 | 93.9 | 2 |
| Sn-1 - 7 | 0.095 | 0.008 | 0.01414 | 0.0002 | 0.0491 | 0.0039 | 91.8 | 7.5 | 90.5 | 1.3 |
| Sn-1 - 15 | 0.0953 | 0.0055 | 0.01369 | 0.00021 | 0.0501 | 0.003 | 92.3 | 5.1 | 87.6 | 1.3 |
| Sn-1 - 6 | 0.0953 | 0.0042 | 0.01387 | 0.00013 | 0.0496 | 0.0022 | 92.4 | 3.9 | 88.8 | 0.9 |
| Sn-1 - 2 | 0.097 | 0.0062 | 0.01441 | 0.00022 | 0.0487 | 0.0031 | 93.8 | 5.7 | 92.2 | 1.4 |
| Sn-1 - 18 | 0.0971 | 0.0056 | 0.01408 | 0.0002 | 0.0495 | 0.0029 | 93.9 | 5.1 | 90.1 | 1.2 |
| Sn-1 - 8 | 0.0979 | 0.0059 | 0.0144 | 0.00023 | 0.049 | 0.0028 | 94.7 | 5.4 | 92.2 | 1.5 |
| Sn-1 - 23 | 0.0985 | 0.0049 | 0.01419 | 0.00022 | 0.0496 | 0.0023 | 95.3 | 4.6 | 90.8 | 1.4 |
| Sn-1 - 13 | 0.0996 | 0.0049 | 0.01431 | 0.00018 | 0.0501 | 0.0025 | 96.3 | 4.5 | 91.6 | 1.2 |
| Sn-1 - 3 | 0.1025 | 0.0069 | 0.01407 | 0.00018 | 0.0526 | 0.0035 | 98.9 | 6.3 | 90.1 | 1.1 |
| Sn-1 - 14 | 0.1035 | 0.0062 | 0.01444 | 0.00022 | 0.0517 | 0.0032 | 99.8 | 5.8 | 92.4 | 1.4 |
| Sn-1 - 17 | 0.1037 | 0.0046 | 0.01564 | 0.00016 | 0.0476 | 0.0022 | 100.1 | 4.3 | 100 | 1 |
| Sn-1 - 22 | 0.109 | 0.013 | 0.01402 | 0.00025 | 0.0552 | 0.0059 | 104 | 12 | 89.8 | 1.6 |
| Sn-1 - 20 | 0.112 | 0.016 | 0.01395 | 0.0003 | 0.0572 | 0.0073 | 106 | 14 | 89.3 | 1.9 |
| Sn-1 - 1 | 0.1143 | 0.0068 | 0.01577 | 0.00039 | 0.0527 | 0.0034 | 109.7 | 6.2 | 100.9 | 2.5 |
| Sn-1 - 5 | 0.1165 | 0.0064 | 0.01532 | 0.00024 | 0.0547 | 0.0026 | 111.7 | 5.8 | 98 | 1.5 |
|  |  |  |  |  |  |  |  |  |  |  |
| Prv-1 - 23 | 0.0834 | 0.008 | 0.01312 | 0.0003 | 0.0456 | 0.004 | 81.0 | 7.4 | 84.0 | 1.9 |
| Prv-1 - 25 | 0.0837 | 0.0062 | 0.01317 | 0.00027 | 0.0461 | 0.003 | 81.4 | 5.9 | 84.3 | 1.7 |
| Prv-1 - 22 | 0.0857 | 0.0077 | 0.01302 | 0.00031 | 0.0476 | 0.005 | 83.2 | 7.2 | 83.4 | 1.9 |
| Prv-1 - 18 | 0.087 | 0.0053 | 0.01304 | 0.00021 | 0.0481 | 0.003 | 84.5 | 5.0 | 83.5 | 1.4 |
| Prv-1 - 9 | 0.0892 | 0.0048 | 0.0134 | 0.00015 | 0.0486 | 0.003 | 86.7 | 4.4 | 85.8 | 1.0 |
| Prv-1 - 2 | 0.0899 | 0.0042 | 0.01376 | 0.00015 | 0.0472 | 0.002 | 87.3 | 3.9 | 88.1 | 0.9 |
| Prv-1 - 16 | 0.091 | 0.0077 | 0.01313 | 0.00023 | 0.0503 | 0.005 | 88.1 | 7.1 | 84.1 | 1.5 |
| Prv-1 - 13 | 0.0919 | 0.0057 | 0.01353 | 0.00018 | 0.0491 | 0.003 | 89.1 | 5.3 | 86.6 | 1.2 |
| Prv-1 - 14 | 0.0921 | 0.0087 | 0.01313 | 0.00032 | 0.05 | 0.005 | 89.1 | 8.0 | 84.1 | 2.0 |
| Prv-1 - 21 | 0.0924 | 0.0082 | 0.01369 | 0.00024 | 0.0485 | 0.004 | 89.3 | 7.6 | 87.6 | 1.5 |
| Prv-1 - 24 | 0.0972 | 0.0095 | 0.01371 | 0.0004 | 0.0494 | 0.005 | 93.8 | 8.7 | 87.7 | 2.6 |
| Prv-1 - 4 | 0.0977 | 0.0074 | 0.01327 | 0.00027 | 0.0534 | 0.004 | 94.3 | 6.9 | 85.0 | 1.7 |
| Prv-1 - 3 | 0.0985 | 0.0034 | 0.01373 | 0.00036 | 0.0522 | 0.002 | 95.3 | 3.1 | 87.9 | 2.3 |
|  |  |  |  |  |  |  |  |  |  |  |
| Prv-2 - 3 | 0.0852 | 0.0087 | 0.01297 | 0.0003 | 0.0481 | 0.005 | 82.7 | 8.1 | 83.1 | 1.9 |
| Prv-2 - 8 | 0.0877 | 0.0038 | 0.01311 | 0.00015 | 0.049 | 0.002 | 85.3 | 3.6 | 84.0 | 0.9 |
| Prv-2 - 13 | 0.0866 | 0.0035 | 0.0132 | 0.00011 | 0.0482 | 0.002 | 84.3 | 3.3 | 84.6 | 0.7 |
| Prv-2 - 17 | 0.0833 | 0.0041 | 0.01321 | 0.00015 | 0.0464 | 0.002 | 81.2 | 3.8 | 84.6 | 1.0 |
| Prv-2 - 24 | 0.0866 | 0.0038 | 0.01322 | 0.00017 | 0.048 | 0.002 | 84.3 | 3.5 | 84.7 | 1.1 |
| Prv-2 - 11 | 0.0849 | 0.0049 | 0.01323 | 0.00017 | 0.0471 | 0.003 | 82.6 | 4.6 | 84.7 | 1.1 |
| Prv-2 - 20 | 0.0863 | 0.0039 | 0.01324 | 0.00015 | 0.0478 | 0.002 | 84.0 | 3.6 | 84.8 | 0.9 |
| Prv-2 - 23 | 0.1008 | 0.0077 | 0.01341 | 0.00022 | 0.055 | 0.004 | 97.2 | 7.0 | 85.9 | 1.4 |
| Prv-2 - 1 | 0.0856 | 0.0038 | 0.01344 | 0.00016 | 0.0466 | 0.002 | 83.3 | 3.6 | 86.0 | 1.0 |
| Prv-2 - 15 | 0.0884 | 0.0042 | 0.01344 | 0.00024 | 0.0484 | 0.002 | 85.9 | 3.9 | 86.1 | 1.5 |
| Prv-2 - 2 | 0.0899 | 0.0035 | 0.01351 | 0.00013 | 0.0487 | 0.002 | 87.4 | 3.2 | 86.5 | 0.9 |
| Prv-2 - 19 | 0.0869 | 0.0063 | 0.01357 | 0.00025 | 0.0472 | 0.004 | 84.3 | 5.9 | 86.9 | 1.6 |
| Prv-2 - 7 | 0.085 | 0.013 | 0.01364 | 0.00042 | 0.0482 | 0.008 | 84.0 | 13.0 | 87.4 | 2.7 |
| Prv-2 - 12 | 0.0898 | 0.0054 | 0.01364 | 0.00017 | 0.0484 | 0.003 | 87.2 | 5.0 | 87.3 | 1.1 |
| Prv-2 - 6 | 0.0882 | 0.005 | 0.01366 | 0.00015 | 0.0473 | 0.003 | 85.7 | 4.6 | 87.4 | 1.0 |
| Prv-2 - 5 | 0.0885 | 0.0043 | 0.01366 | 0.00028 | 0.0475 | 0.002 | 86.0 | 4.0 | 87.4 | 1.8 |
| Prv-2 - 16 | 0.0897 | 0.0069 | 0.01372 | 0.00022 | 0.0473 | 0.004 | 86.9 | 6.4 | 87.8 | 1.4 |
| Prv-2 - 18 | 0.0821 | 0.0055 | 0.01373 | 0.00026 | 0.0445 | 0.003 | 81.1 | 5.6 | 87.9 | 1.6 |
| Prv-2 - 14 | 0.0907 | 0.0033 | 0.01375 | 0.00017 | 0.0484 | 0.002 | 88.1 | 3.1 | 88.0 | 1.1 |
| Prv-2 - 25 | 0.0911 | 0.0044 | 0.01382 | 0.00017 | 0.0484 | 0.002 | 88.5 | 4.1 | 88.5 | 1.1 |
| Prv-2 - 21 | 0.0865 | 0.0037 | 0.01385 | 0.00015 | 0.0457 | 0.002 | 84.2 | 3.4 | 88.7 | 1.0 |
| Prv-2 - 10 | 0.092 | 0.003 | 0.01395 | 0.0002 | 0.0484 | 0.002 | 89.3 | 2.8 | 89.3 | 1.3 |
|  |  |  |  |  |  |  |  |  |  |  |
| Vd-1 - 20 | 0.0867 | 0.0051 | 0.01315 | 0.00015 | 0.0474 | 0.003 | 84.3 | 4.7 | 84.2 | 1.0 |
| Vd-1 - 14 | 0.0953 | 0.0032 | 0.01321 | 0.00016 | 0.0517 | 0.002 | 92.4 | 3.0 | 84.6 | 1.0 |
| Vd-1 - 25 | 0.0905 | 0.005 | 0.01334 | 0.00023 | 0.0493 | 0.003 | 87.9 | 4.6 | 85.4 | 1.5 |
| Vd-1 - 15 | 0.0906 | 0.0041 | 0.01346 | 0.00019 | 0.0485 | 0.002 | 87.9 | 3.8 | 86.2 | 1.2 |
| Vd-1 - 7 | 0.0921 | 0.0037 | 0.01347 | 0.00014 | 0.0493 | 0.002 | 89.4 | 3.4 | 86.3 | 0.9 |
| Vd-1 - 21 | 0.0855 | 0.0042 | 0.01351 | 0.00022 | 0.0458 | 0.002 | 83.2 | 3.9 | 86.5 | 1.4 |
| Vd-1 - 3 | 0.0905 | 0.0056 | 0.01354 | 0.00016 | 0.0483 | 0.003 | 87.8 | 5.2 | 86.7 | 1.0 |
| Vd-1 - 11 | 0.09 | 0.0026 | 0.01395 | 0.00015 | 0.0465 | 0.001 | 87.5 | 2.4 | 89.3 | 1.0 |
| Vd-1 - 2 | 0.0984 | 0.0031 | 0.01401 | 0.00015 | 0.0507 | 0.002 | 95.3 | 2.9 | 89.7 | 1.0 |
| Vd-1 - 23 | 0.0911 | 0.0033 | 0.01411 | 0.00015 | 0.0466 | 0.002 | 88.5 | 3.1 | 90.4 | 0.9 |
| Vd-1 - 18 | 0.0912 | 0.0031 | 0.01411 | 0.00017 | 0.0466 | 0.002 | 88.5 | 2.9 | 90.3 | 1.1 |
| Vd-1 - 8 | 0.0926 | 0.0074 | 0.01418 | 0.00035 | 0.0463 | 0.004 | 89.7 | 6.9 | 90.8 | 2.3 |
| Vd-1 - 13 | 0.0978 | 0.0047 | 0.01418 | 0.00017 | 0.0497 | 0.003 | 94.6 | 4.3 | 90.8 | 1.1 |
|  |  |  |  |  |  |  |  |  |  |  |
| Vd-2 - 6 | 0.0831 | 0.0064 | 0.01283 | 0.0002 | 0.0478 | 0.002 | 81.8 | 2.6 | 82.2 | 0.8 |
| Vd-2 - 19 | 0.084 | 0.0028 | 0.01283 | 0.00012 | 0.0467 | 0.002 | 82.3 | 2.0 | 83.3 | 0.7 |
| Vd-2 - 11 | 0.087 | 0.0072 | 0.01283 | 0.00022 | 0.0469 | 0.002 | 83.9 | 2.8 | 85.2 | 0.7 |
| Vd-2 - 24 | 0.0864 | 0.0029 | 0.01294 | 0.00014 | 0.0482 | 0.002 | 84.1 | 2.7 | 82.9 | 0.9 |
| Vd-2 - 10 | 0.0845 | 0.0022 | 0.01301 | 0.00011 | 0.0486 | 0.004 | 83.9 | 6.7 | 84.1 | 1.6 |
| Vd-2 - 12 | 0.0839 | 0.0044 | 0.01306 | 0.00015 | 0.0456 | 0.005 | 83.8 | 8.4 | 86.8 | 2.3 |
| Vd-2 - 13 | 0.0865 | 0.0052 | 0.01307 | 0.00016 | 0.0481 | 0.003 | 84.1 | 4.8 | 83.7 | 1.0 |
| Vd-2 - 3 | 0.1 | 0.011 | 0.01309 | 0.0002 | 0.0472 | 0.002 | 84.5 | 3.5 | 86.8 | 0.8 |
| Vd-2 - 16 | 0.0865 | 0.0071 | 0.01313 | 0.00025 | 0.0493 | 0.004 | 84.5 | 6.7 | 82.2 | 1.4 |
| Vd-2 - 14 | 0.0899 | 0.0054 | 0.01318 | 0.00019 | 0.0508 | 0.002 | 85.0 | 3.4 | 80.0 | 1.1 |
| Vd-2 - 18 | 0.0885 | 0.0061 | 0.0132 | 0.00027 | 0.0485 | 0.003 | 85.9 | 5.7 | 84.5 | 1.7 |
| Vd-2 - 1 | 0.0909 | 0.0072 | 0.0132 | 0.00028 | 0.0497 | 0.003 | 87.2 | 5.1 | 84.4 | 1.2 |
| Vd-2 - 15 | 0.0995 | 0.0041 | 0.01323 | 0.00017 | 0.0526 | 0.003 | 88.1 | 3.9 | 81.0 | 1.0 |
| Vd-2 - 20 | 0.0862 | 0.003 | 0.01331 | 0.0001 | 0.0498 | 0.004 | 88.0 | 6.7 | 84.5 | 1.8 |
|  |  |  |  |  |  |  |  |  |  |  |
| Vd-3 - 13 | 0.0853 | 0.0032 | 0.01246 | 0.00015 | 0.0498 | 0.002 | 83.0 | 3.0 | 79.8 | 1.0 |
| Vd-3 - 12 | 0.0765 | 0.0079 | 0.01252 | 0.00025 | 0.0452 | 0.005 | 74.5 | 7.5 | 80.2 | 1.6 |
| Vd-3 - 8 | 0.0856 | 0.0047 | 0.01272 | 0.00021 | 0.0492 | 0.003 | 83.3 | 4.4 | 81.5 | 1.4 |
| Vd-3 - 18 | 0.0783 | 0.0046 | 0.0128 | 0.0002 | 0.0448 | 0.003 | 76.5 | 4.3 | 82.0 | 1.3 |
| Vd-3 - 6 | 0.0844 | 0.0053 | 0.01283 | 0.00014 | 0.0478 | 0.003 | 82.1 | 5.0 | 82.2 | 0.9 |
| Vd-3 - 25 | 0.0844 | 0.0057 | 0.01292 | 0.0002 | 0.0476 | 0.003 | 82.1 | 5.3 | 82.7 | 1.3 |
| Vd-3 - 19 | 0.0842 | 0.0057 | 0.01297 | 0.00026 | 0.0475 | 0.003 | 81.9 | 5.3 | 83.1 | 1.7 |
| Vd-3 - 10 | 0.0866 | 0.0031 | 0.01306 | 0.00016 | 0.0482 | 0.002 | 84.3 | 2.9 | 83.7 | 1.0 |
| Vd-3 - 21 | 0.0885 | 0.0034 | 0.01308 | 0.00017 | 0.0494 | 0.002 | 86.0 | 3.2 | 83.8 | 1.1 |
| Vd-3 - 20 | 0.0841 | 0.0063 | 0.01311 | 0.00024 | 0.0469 | 0.004 | 81.8 | 5.9 | 84.0 | 1.5 |
| Vd-3 - 5 | 0.0867 | 0.0031 | 0.01332 | 0.00012 | 0.0472 | 0.002 | 84.3 | 2.9 | 85.3 | 0.7 |
| Vd-3 - 24 | 0.0933 | 0.0055 | 0.01336 | 0.00016 | 0.0509 | 0.003 | 90.4 | 5.1 | 85.6 | 1.0 |
| Vd-3 - 14 | 0.0918 | 0.008 | 0.01373 | 0.00029 | 0.0489 | 0.004 | 88.9 | 7.4 | 87.9 | 1.8 |
| Vd-3 - 22 | 0.0913 | 0.0039 | 0.01382 | 0.00021 | 0.0482 | 0.002 | 88.7 | 3.7 | 88.5 | 1.3 |
| Vd-3 - 23 | 0.1011 | 0.0041 | 0.01393 | 0.00019 | 0.053 | 0.002 | 97.7 | 3.8 | 89.2 | 1.2 |
| Vd-3 - 2 | 0.1017 | 0.0051 | 0.01401 | 0.00022 | 0.0524 | 0.002 | 98.2 | 4.7 | 89.7 | 1.4 |
| Vd-3 - 11 | 0.0925 | 0.006 | 0.01404 | 0.00024 | 0.0479 | 0.003 | 89.6 | 5.6 | 89.9 | 1.5 |
|  |  |  |  |  |  |  |  |  |  |  |
| Mal-1 - 1 | 0.0772 | 0.005 | 0.01126 | 0.00018 | 0.0489 | 0.003 | 75.4 | 4.7 | 72.2 | 1.1 |
| Mal-1 - 2 | 0.0769 | 0.0089 | 0.0117 | 0.00029 | 0.047 | 0.005 | 74.8 | 8.3 | 75.0 | 1.9 |
| Mal-1 - 3 | 0.0808 | 0.0092 | 0.01211 | 0.0003 | 0.0476 | 0.005 | 78.5 | 8.6 | 77.6 | 1.9 |
| Mal-1 - 4 | 0.0755 | 0.0072 | 0.01156 | 0.00022 | 0.0466 | 0.004 | 73.6 | 6.8 | 74.1 | 1.4 |
| Mal-1 - 5 | 0.0734 | 0.0036 | 0.0117 | 0.00016 | 0.0448 | 0.002 | 71.8 | 3.4 | 75.0 | 1.0 |
| Mal-1 - 6 | 0.0764 | 0.0062 | 0.01109 | 0.00023 | 0.0494 | 0.004 | 74.6 | 5.8 | 71.1 | 1.5 |
| Mal-1 - 7 | 0.0753 | 0.006 | 0.01194 | 0.00022 | 0.0453 | 0.004 | 73.5 | 5.7 | 76.5 | 1.4 |
| Mal-1 - 8 | 0.0773 | 0.0078 | 0.01157 | 0.00027 | 0.048 | 0.005 | 75.3 | 7.3 | 74.2 | 1.7 |
| Mal-1 - 9 | 0.0791 | 0.0054 | 0.0119 | 0.00021 | 0.0476 | 0.003 | 77.2 | 5.0 | 76.3 | 1.3 |
| Mal-1 - 10 | 0.079 | 0.0087 | 0.01136 | 0.00024 | 0.0501 | 0.006 | 76.8 | 8.1 | 72.8 | 1.5 |
| Mal-1 - 11 | 0.0755 | 0.0045 | 0.01171 | 0.00017 | 0.0463 | 0.003 | 73.8 | 4.2 | 75.0 | 1.1 |
| Mal-1 - 12 | 0.0868 | 0.0053 | 0.01142 | 0.00022 | 0.0545 | 0.003 | 84.4 | 4.9 | 73.2 | 1.4 |
| Mal-1 - 13 | 0.0801 | 0.0063 | 0.01211 | 0.0002 | 0.0476 | 0.004 | 78.0 | 6.0 | 77.6 | 1.3 |
| Mal-1 - 15 | 0.0792 | 0.0077 | 0.01153 | 0.00026 | 0.0494 | 0.005 | 77.0 | 7.3 | 73.9 | 1.6 |
| Mal-1 - 16 | 0.083 | 0.011 | 0.01129 | 0.00029 | 0.0549 | 0.008 | 83.0 | 11.0 | 72.4 | 1.9 |
| Mal-1 - 17 | 0.0808 | 0.0098 | 0.0116 | 0.00027 | 0.0501 | 0.006 | 78.4 | 9.2 | 74.4 | 1.7 |
| Mal-1 - 18 | 0.077 | 0.01 | 0.01234 | 0.00041 | 0.0449 | 0.006 | 74.4 | 9.6 | 79.1 | 2.6 |
| Mal-1 - 19 | 0.0802 | 0.0059 | 0.01155 | 0.00021 | 0.05 | 0.004 | 78.1 | 5.5 | 74.0 | 1.3 |
| Mal-1 - 20 | 0.0755 | 0.0073 | 0.01166 | 0.0003 | 0.0468 | 0.004 | 73.6 | 6.9 | 74.7 | 1.9 |
| Mal-1 - 21 | 0.082 | 0.01 | 0.01159 | 0.00025 | 0.0513 | 0.006 | 79.8 | 9.3 | 74.3 | 1.6 |
| Mal-1 - 22 | 0.0686 | 0.0084 | 0.01146 | 0.00027 | 0.043 | 0.005 | 67.0 | 8.0 | 73.5 | 1.7 |
| Mal-1 - 23 | 0.073 | 0.011 | 0.012 | 0.00038 | 0.0452 | 0.007 | 71.1 | 9.9 | 76.9 | 2.4 |
| Mal-1 - 24 | 0.0773 | 0.0069 | 0.01139 | 0.00022 | 0.0482 | 0.004 | 75.3 | 6.5 | 73.0 | 1.4 |
| Mal-1 - 25 | 0.0742 | 0.0043 | 0.01199 | 0.00017 | 0.0449 | 0.003 | 72.6 | 4.0 | 76.9 | 1.1 |
|  |  |  |  |  |  |  |  |  |  |  |
| DArm-1 - 5 | 0.0794 | 0.0066 | 0.01117 | 0.00028 | 0.0522 | 0.004 | 77.4 | 6.2 | 71.6 | 1.8 |
| DArm-1 - 14 | 0.0745 | 0.0039 | 0.01124 | 0.00015 | 0.0487 | 0.003 | 72.9 | 3.7 | 72.1 | 1.0 |
| DArm-1 - 18 | 0.0692 | 0.0063 | 0.01129 | 0.00022 | 0.045 | 0.004 | 67.7 | 6.0 | 72.4 | 1.4 |
| DArm-1 - 8 | 0.0701 | 0.005 | 0.01134 | 0.00019 | 0.0455 | 0.003 | 68.6 | 4.8 | 72.7 | 1.2 |
| DArm-1 - 11 | 0.07 | 0.005 | 0.01137 | 0.00018 | 0.0462 | 0.004 | 68.5 | 4.8 | 72.9 | 1.2 |
| DArm-1 - 16 | 0.0772 | 0.0059 | 0.01141 | 0.00023 | 0.0497 | 0.004 | 75.3 | 5.6 | 73.2 | 1.5 |
| DArm-1 - 22 | 0.0783 | 0.0058 | 0.01145 | 0.00019 | 0.0501 | 0.004 | 76.4 | 5.5 | 73.4 | 1.2 |
| DArm-1 - 3 | 0.0856 | 0.0079 | 0.01146 | 0.00021 | 0.0552 | 0.005 | 83.0 | 7.3 | 73.4 | 1.4 |
| DArm-1 - 2 | 0.0723 | 0.0066 | 0.01147 | 0.00026 | 0.0467 | 0.004 | 70.7 | 6.2 | 73.5 | 1.7 |
| DArm-1 - 15 | 0.0771 | 0.007 | 0.01156 | 0.00025 | 0.0494 | 0.005 | 75.2 | 6.6 | 74.1 | 1.6 |
| DArm-1 - 19 | 0.0759 | 0.0061 | 0.01159 | 0.0002 | 0.0481 | 0.004 | 74.1 | 5.8 | 74.3 | 1.3 |
| DArm-1 - 6 | 0.0828 | 0.0057 | 0.01161 | 0.00022 | 0.0533 | 0.004 | 80.6 | 5.3 | 74.4 | 1.4 |
| DArm-1 - 24 | 0.08 | 0.0069 | 0.01167 | 0.00022 | 0.0492 | 0.004 | 77.9 | 6.4 | 74.8 | 1.4 |
| DArm-1 - 21 | 0.0796 | 0.0059 | 0.01171 | 0.00021 | 0.0499 | 0.004 | 77.5 | 5.6 | 75.1 | 1.3 |
| DArm-1 - 20 | 0.0788 | 0.0073 | 0.01175 | 0.00021 | 0.0493 | 0.005 | 76.8 | 6.9 | 75.3 | 1.3 |
|  |  |  |  |  |  |  |  |  |  |  |
| DArm-2 - 9 | 0.0668 | 0.0059 | 0.01125 | 0.00024 | 0.0437 | 0.004 | 65.5 | 5.6 | 72.1 | 1.5 |
| DArm-2 - 24 | 0.0742 | 0.0061 | 0.01127 | 0.0002 | 0.0481 | 0.004 | 72.5 | 5.8 | 72.2 | 1.2 |
| DArm-2 - 20 | 0.0735 | 0.0075 | 0.01137 | 0.00026 | 0.0474 | 0.005 | 71.7 | 7.1 | 72.9 | 1.7 |
| DArm-2 - 12 | 0.0734 | 0.0076 | 0.01138 | 0.00029 | 0.0473 | 0.005 | 71.6 | 7.2 | 72.9 | 1.9 |
| DArm-2 - 6 | 0.0763 | 0.0039 | 0.01146 | 0.00013 | 0.0486 | 0.002 | 74.6 | 3.7 | 73.4 | 0.9 |
| DArm-2 - 10 | 0.0748 | 0.0065 | 0.01146 | 0.00023 | 0.0477 | 0.004 | 73.0 | 6.2 | 73.4 | 1.5 |
| DArm-2 - 22 | 0.0785 | 0.0068 | 0.01149 | 0.0002 | 0.0498 | 0.005 | 76.4 | 6.5 | 73.7 | 1.3 |
| DArm-2 - 16 | 0.0763 | 0.0066 | 0.01159 | 0.00028 | 0.0486 | 0.004 | 74.4 | 6.3 | 74.3 | 1.8 |
| DArm-2 - 17 | 0.0737 | 0.0074 | 0.0116 | 0.0003 | 0.0467 | 0.005 | 71.9 | 7.0 | 74.3 | 1.9 |
| DArm-2 - 4 | 0.0824 | 0.008 | 0.01167 | 0.00021 | 0.052 | 0.005 | 80.1 | 7.5 | 74.8 | 1.3 |
| DArm-2 - 5 | 0.089 | 0.012 | 0.01171 | 0.00029 | 0.055 | 0.007 | 86.0 | 11.0 | 75.1 | 1.9 |
| DArm-2 - 11 | 0.0788 | 0.0059 | 0.01171 | 0.00017 | 0.0492 | 0.004 | 76.8 | 5.6 | 75.1 | 1.1 |
| DArm-2 - 3 | 0.0756 | 0.0054 | 0.01175 | 0.00018 | 0.0478 | 0.004 | 73.8 | 5.1 | 75.3 | 1.2 |
| DArm-2 - 8 | 0.0763 | 0.0062 | 0.01177 | 0.0003 | 0.0473 | 0.004 | 74.5 | 5.9 | 75.4 | 1.9 |
| DArm-2 - 23 | 0.0844 | 0.0077 | 0.0119 | 0.00031 | 0.0509 | 0.005 | 82.0 | 7.2 | 76.2 | 2.0 |
| DArm-2 - 1 | 0.0779 | 0.0061 | 0.01197 | 0.00022 | 0.0485 | 0.004 | 75.9 | 5.7 | 76.7 | 1.4 |
| DArm-2 - 14 | 0.128 | 0.019 | 0.01199 | 0.00016 | 0.077 | 0.011 | 121.0 | 17.0 | 76.8 | 1.0 |
| DArm-2 - 21 | 0.107 | 0.024 | 0.01208 | 0.0003 | 0.062 | 0.012 | 101.0 | 20.0 | 77.4 | 1.9 |
